# Supplementary material
Source: PubMed Central journal article supplement (PMC8443237)
Supplement: NIHMS1629538-supplement-1.pdf [file NIHMS1629538-supplement-1.pdf]

**Preoperative Medical Testing and Falls in Medicare Beneficiaries Awaiting Cataract Surgery**

**ONLINE SUPPLEMENT**

## TABLE OF CONTENTS

1. **eTable 1: CPT codes for preoperative tests used to stratify physicians**
2. **eTable 2: Predictors of falling within 360 days before ocular biometry**
3. **eTable 3: Estimated time in days between biometry and surgery**

**eTable 1: CPT codes for preoperative tests used to stratify physicians**

| Test Grouping            | Preoperative Test Name                                                                                      | CPT Code                          |
|--------------------------|-------------------------------------------------------------------------------------------------------------|-----------------------------------|
| Electrocardiography      | 12-lead EKG                                                                                                 | 93000, 93005, 93010               |
| Echocardiography         | TTE                                                                                                         | 93306, 93307                      |
| Cardiac stress test      | Stress EKG                                                                                                  | 93015, 93016, 93017, 93018        |
| Cardiac stress test      | Stress echo                                                                                                 | 93350, 93351, +/- 93352           |
| Cardiac stress test      | Stress MRI                                                                                                  | 75561, 75563                      |
| Cardiac stress test      | Myocardial Perfusion Imaging, SPECT                                                                         | 78451, 78452                      |
| Cardiac stress test      | Myocardial Perfusion Imaging, planar                                                                        | 78453, 78454                      |
| Chest radiograph         | Chest radiograph                                                                                            | 71010, 71020                      |
| Pulmonary function tests | Spirometry                                                                                                  | 94010                             |
| Pulmonary function tests | Bronchodilation responsiveness, spirometry pre- and post-bronchodilator administration                      | 94060                             |
| Pulmonary function tests | Plethysmography                                                                                             | 93720, 93721, 93722               |
| Pulmonary function tests | Functional residual capacity or residual volume: helium, nitrogen                                           | 94240                             |
| Pulmonary function tests | Thoracic gas volume                                                                                         | 94260                             |
| Pulmonary function tests | Determination of maldistribution of inspired gas: helium, nitrogen                                          | 94350                             |
| Pulmonary function tests | Airway closing volume                                                                                       | 94370                             |
| Pulmonary function tests | Resistance to airflow                                                                                       | 94360                             |
| Pulmonary function tests | CO diffusing capacity                                                                                       | 94720                             |
| Pulmonary function tests | Membrane diffusion capacity                                                                                 | 94725                             |
| Complete blood count     | Complete blood count                                                                                        | 85025, 85027                      |
| Complete blood count     | Hematocrit                                                                                                  | 85014                             |
| Complete blood count     | Hemoglobin                                                                                                  | 85018                             |
| Complete blood count     | WBC                                                                                                         | 85048                             |
| Complete blood count     | Platelet count                                                                                              | 85049                             |
| Coagulation panel        | PT w/INR                                                                                                    | 85610                             |
| Coagulation panel        | PTT                                                                                                         | 85730                             |
| Chemistry panel          | Basic metabolic panel (Na, K, Cl, CO2, BUN, Cr, Glucose, iCa/Ca)                                            | 80047, 80048                      |
| Chemistry panel          | Electrolyte panel (Na, K, Cl, CO2)                                                                          | 80051                             |
| Chemistry panel          | Comprehensive metabolic panel (Na, K, Cl, CO2, BUN, Cr, Glu, AST, ALT, Alk phos, Tprot, Albumin, Tbili, Ca) | 80053                             |
| Chemistry panel          | Renal function panel (Na, K, Cl, CO2, BUN, Cr, Glucose, Ca, PO4, Albumin)                                   | 80069                             |
| Chemistry panel          | Hepatic function panel (AST, ALT, Alk phos, TProt, Albumin, TBili, DBili)                                   | 80076                             |
| Chemistry panel          | Calcium, serum                                                                                              | 82310                             |
| Chemistry panel          | Calcium, ionized                                                                                            | 82330                             |
| Chemistry panel          | Bicarbonate                                                                                                 | 82374                             |
| Chemistry panel          | Chloride                                                                                                    | 82435                             |
| Chemistry panel          | Glucose                                                                                                     | 82947                             |
| Chemistry panel          | Magnesium                                                                                                   | 83735                             |
| Chemistry panel          | Phosphorus                                                                                                  | 84100                             |
| Chemistry panel          | Potassium                                                                                                   | 84132                             |
| Chemistry panel          | Sodium                                                                                                      | 84295                             |
| Chemistry panel          | Creatinine                                                                                                  | 82565                             |
| Chemistry panel          | BUN                                                                                                         | 84520                             |
| Chemistry panel          | Albumin                                                                                                     | 82040                             |
| Chemistry panel          | Bilirubin, total                                                                                            | 82247                             |
| Chemistry panel          | Bilirubin, direct                                                                                           | 82248                             |
| Chemistry panel          | Alkaline phosphatase                                                                                        | 84075                             |
| Chemistry panel          | Total protein                                                                                               | 84155                             |
| Chemistry panel          | AST                                                                                                         | 84450                             |
| Chemistry panel          | ALT                                                                                                         | 84460                             |
| Urinalysis               | Urinalysis                                                                                                  | 81000, 81001, 81002, 81003, 81005 |

**eTable 2: Predictors of falling within 360 days before ocular biometry**

|                                  | <b>Unadjusted OR<br/>(95% CI)</b> | <b>p-value</b> | <b>Adjusted OR<br/>(95% CI)</b> | <b>p-value</b> |
|----------------------------------|-----------------------------------|----------------|---------------------------------|----------------|
| Age (mean +/- SD)                | 1.03 (1.02-1.03)                  | <0.0001        | 1.02 (1.02-1.03)                | <0.0001        |
| Sex                              |                                   |                |                                 |                |
| Male                             | Ref                               |                | Ref                             |                |
| Female                           | 1.54 (1.49-1.60)                  | <0.0001        | 1.61 (1.56-1.67)                | <0.0001        |
| Race                             |                                   |                |                                 |                |
| White                            | Ref                               |                | Ref                             |                |
| Black                            | 0.60 (0.55-0.66)                  | <0.0001        | 0.54 (0.50-0.60)                | <0.0001        |
| Other                            | 1.07 (1.01-1.14)                  | 0.03           | 0.97 (0.91-1.03)                | 0.33           |
| Charlson comorbidity index       |                                   |                |                                 |                |
| 0-1                              | Ref                               |                | Ref                             |                |
| 2                                | 1.37 (1.30-1.43)                  | <0.0001        | 1.40 (1.34-1.47)                | <0.0001        |
| 3+                               | 2.06 (1.98-2.14)                  | <0.0001        | 2.15 (2.07-2.23)                | <0.0001        |
| Physician preop testing behavior |                                   |                |                                 |                |
| Low-testing physicians           | Ref                               |                | Ref                             |                |
| High-testing physicians          | 1.08 (1.04-1.13)                  | 0.0003         | 1.03 (0.99-1.08)                | 0.11           |

1) Adjusted for age, sex, race and health status.

**eTable 3: Estimated time in days between biometry and surgery<sup>1</sup>**

|                                  | <b>Unadjusted Estimate<br/>(95% CI)</b> | <b>p-value</b> | <b>Adjusted Estimate<br/>(95% CI)</b> | <b>p-value</b> |
|----------------------------------|-----------------------------------------|----------------|---------------------------------------|----------------|
| Age (mean +/- SD)                | 0.31 (0.22, 0.40)                       | <0.0001        | -0.17 (-0.26, -0.08)                  | 0.0001         |
| Sex                              |                                         |                |                                       |                |
| Male                             | Ref                                     |                | Ref                                   |                |
| Female                           | 4.54 (3.35, 5.73)                       | <0.0001        | 4.46 (3.32, 5.61)                     | <0.0001        |
| Race                             |                                         |                |                                       |                |
| White                            | Ref                                     |                | Ref                                   |                |
| Black                            | 15.75 (13.08, 18.42)                    | <0.0001        | 8.94 (6.36, 11.52)                    | <0.0001        |
| Other                            | 16.10 (13.84, 18.38)                    | <0.0001        | 7.14 (4.92, 9.35)                     | <0.0001        |
| Charlson comorbidity index       |                                         |                |                                       |                |
| 0-1                              | Ref                                     |                | Ref                                   |                |
| 2                                | 1.29 (-0.55, 3.13)                      | 0.1685         | 1.07 (-0.70, 2.84)                    | 0.2362         |
| 3+                               | 3.37 (1.74, 5.01)                       | <0.0001        | 0.86 (-0.72, 2.44)                    | 0.2857         |
| Physician preop testing behavior |                                         |                |                                       |                |
| Low-testing physicians           | Ref                                     |                | Ref                                   |                |
| High-testing physicians          | 17.17 (15.63, 18.74)                    | <0.0001        | 7.97 (6.40, 9.55)                     | <0.0001        |
| Ophthalmologist age <sup>2</sup> |                                         |                |                                       |                |
| ≤40                              | Ref                                     |                | Ref                                   |                |
| 41-50                            | -4.89 (-7.02, -2.76)                    | <0.0001        | -4.27 (-6.28, -2.26)                  | <0.0001        |
| 51-60                            | -3.71 (-5.80, -1.63)                    | 0.0005         | -3.67 (-5.65, -1.69)                  | 0.0003         |
| ≥61                              | -9.00 (-11.29, -6.71)                   | <0.0001        | -9.83 (-12.00, -7.66)                 | <0.0001        |
| Ophthalmologist sex <sup>2</sup> |                                         |                |                                       |                |
| Male                             | Ref                                     |                | Ref                                   |                |
| Female                           | 6.09 (4.06, 8.12)                       | <0.0001        | 1.62 (-0.32, 3.55)                    | 0.1009         |
| Surgical volume                  |                                         |                |                                       |                |
| Q1 (10-26)                       | Ref                                     |                | Ref                                   |                |
| Q2 (27-43)                       | -8.51 (-10.11, -6.90)                   | <0.0001        | -3.02 (-4.59, -1.45)                  | 0.0002         |
| Q3 (44-75)                       | -12.46 (-14.06, -10.86)                 | <0.0001        | -4.57 (-6.17, -2.97)                  | <0.0001        |
| Q4 (76-376)                      | -17.65 (-19.25, -16.04)                 | <0.0001        | -5.63 (-7.31, -3.96)                  | <0.0001        |
| Geographic region                |                                         |                |                                       |                |
| Northeast                        | Ref                                     |                | Ref                                   |                |
| Midwest                          | -16.97 (-18.71, -15.23)                 | <0.0001        | -10.19 (-11.92, -8.47)                | <0.0001        |
| South                            | -19.86 (-21.43, -18.29)                 | <0.0001        | -13.02 (-14.59, -11.45)               | <0.0001        |
| West                             | -15.14 (-17.11, -13.18)                 | <0.0001        | -11.18 (-13.11, -9.25)                | <0.0001        |
| Surgical setting                 |                                         |                |                                       |                |
| Ambulatory surgery center        | Ref                                     |                | Ref                                   |                |
| Hospital outpatient department   | 4.04 (2.84, 5.24)                       | <0.0001        | 2.29 (1.01, 3.57)                     | 0.0004         |
| Office                           | -6.66 (-9.03, -4.29)                    | <0.0001        | -5.03 (-7.51, -2.55)                  | <.0001         |
| Other                            | 12.78 (-2.50, 28.05)                    | 0.10           | 6.06 (-9.47, 21.59)                   | 0.44           |
| No surgery                       | N/A                                     | -              | N/A                                   | -              |

1) For this model only, patients were analyzed using the actual number of days that elapsed between biometry and surgery. Patients who did not have a surgery claim following biometry were assigned an interval of 365 days.

2) Data obtained from the American Medical Association Physician MasterFile was linked to the Medicare files by physician NPI.
